# Supplementary material
Source: publisher figshare collection journal article supplement (https://karger.figshare.com/articles/dataset/_/5121613)

## Supplementary figure 5

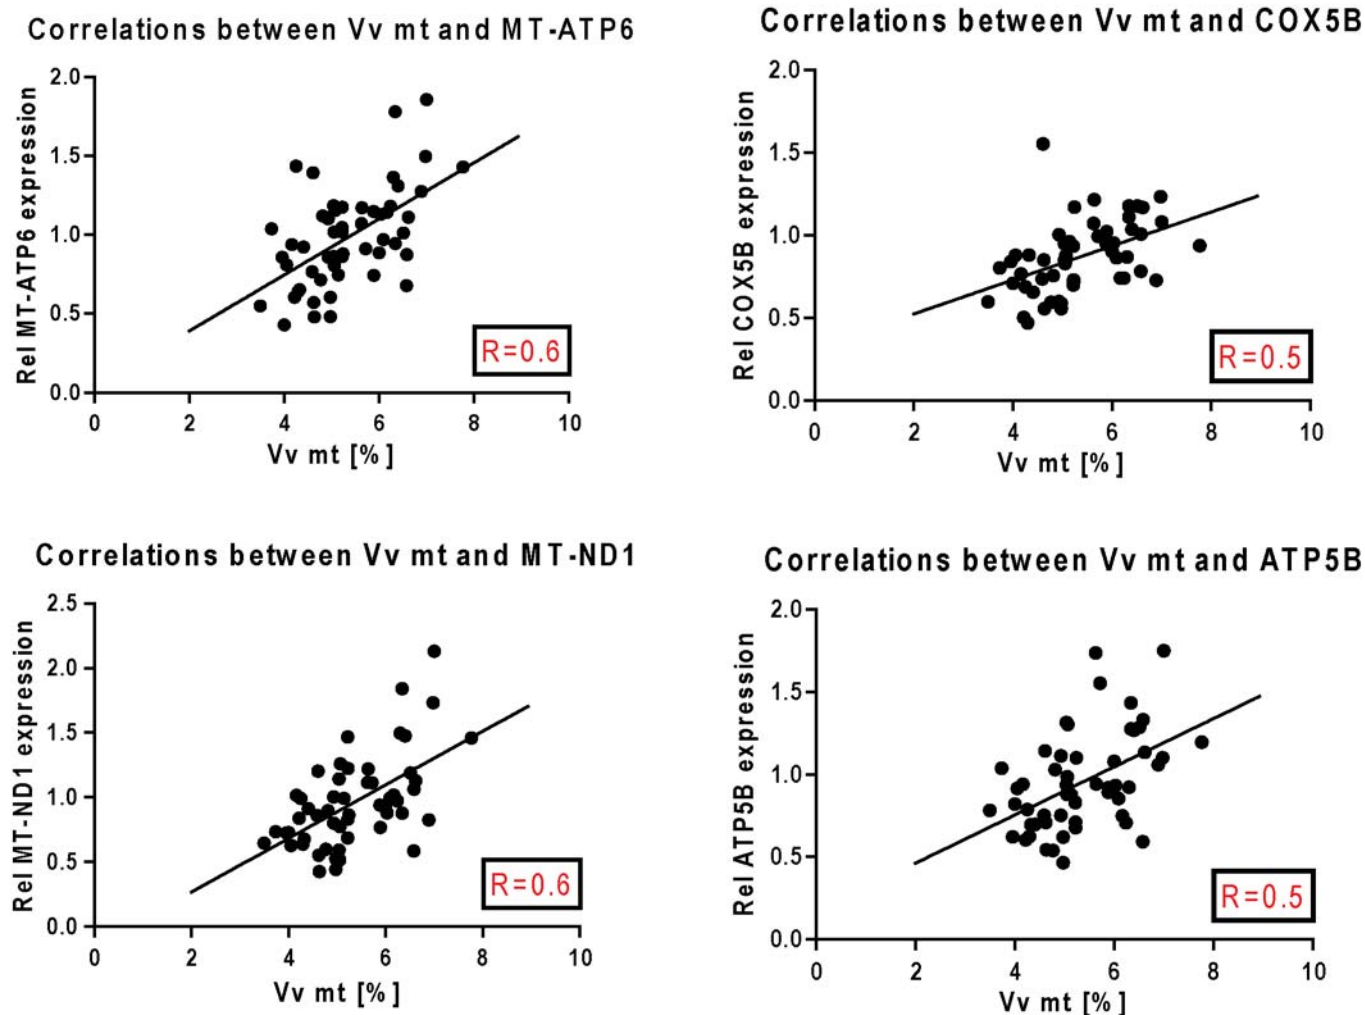

Figure 5 displays a highly significant ( $P<0.01$ ) positive correlation between mitochondrial volume density and expression of mitochondrially encoded ATP-6, ND1 and nuclear encoded COX5B and ATP5B. RET and EET subjects were pooled ( $n = 27$ , 54 datapoints). Respective Pearson's coefficients of correlation are indicated in the figures.

# Supplementary figure 6

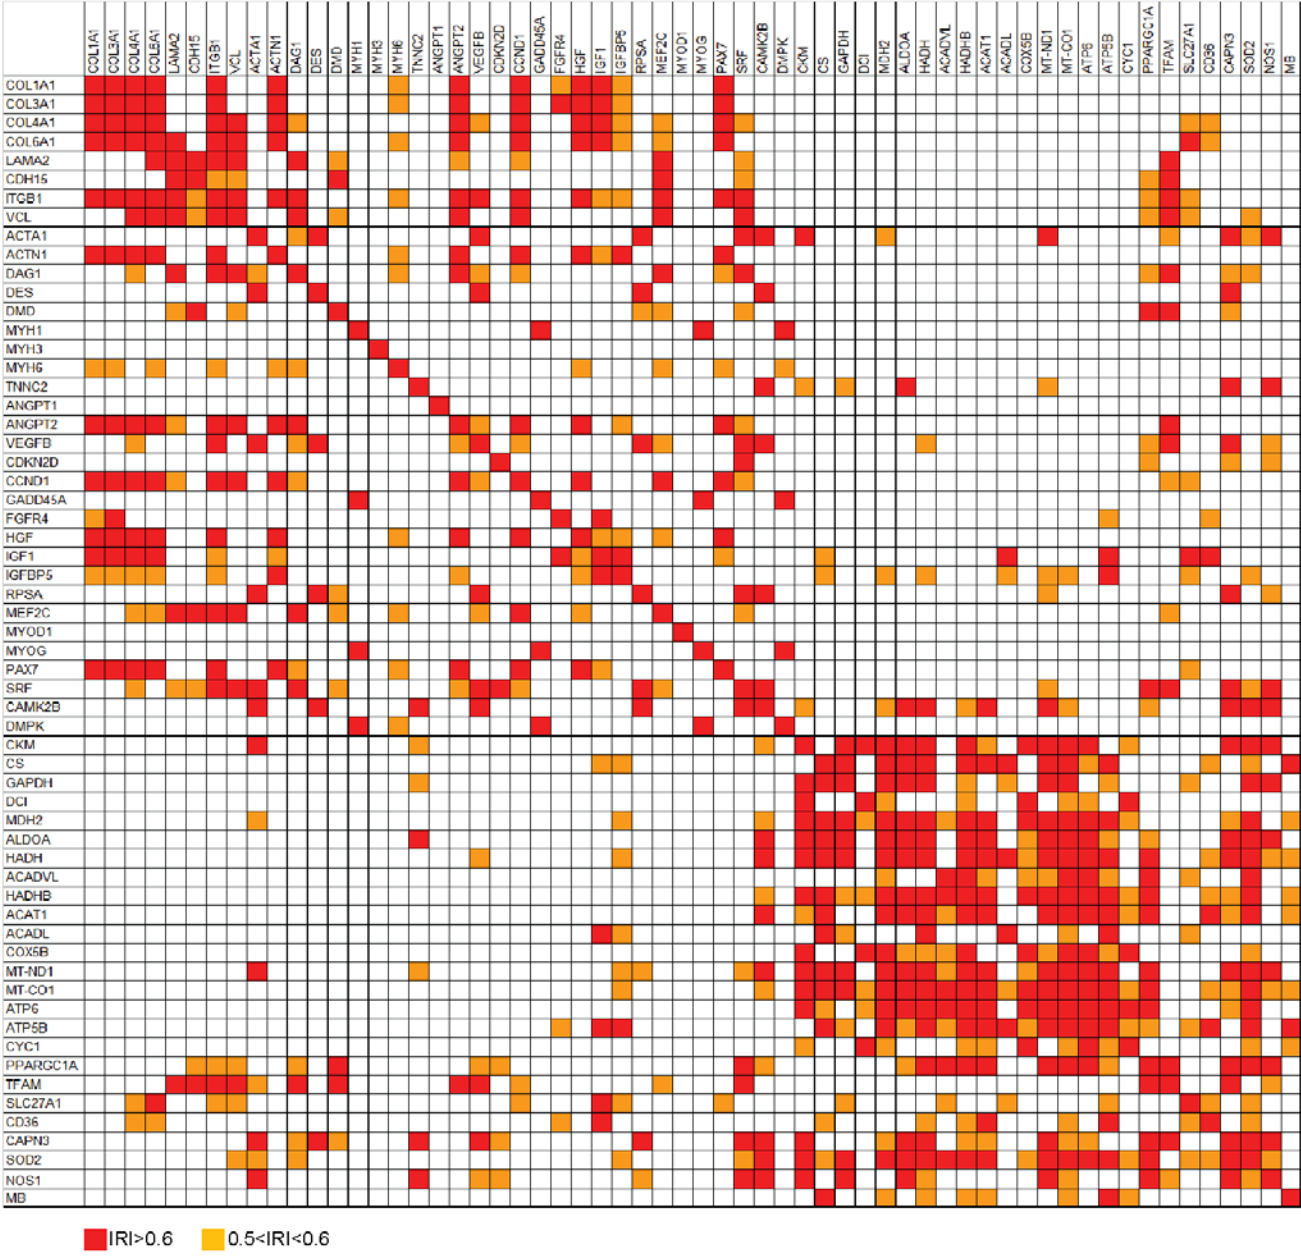

figure 6

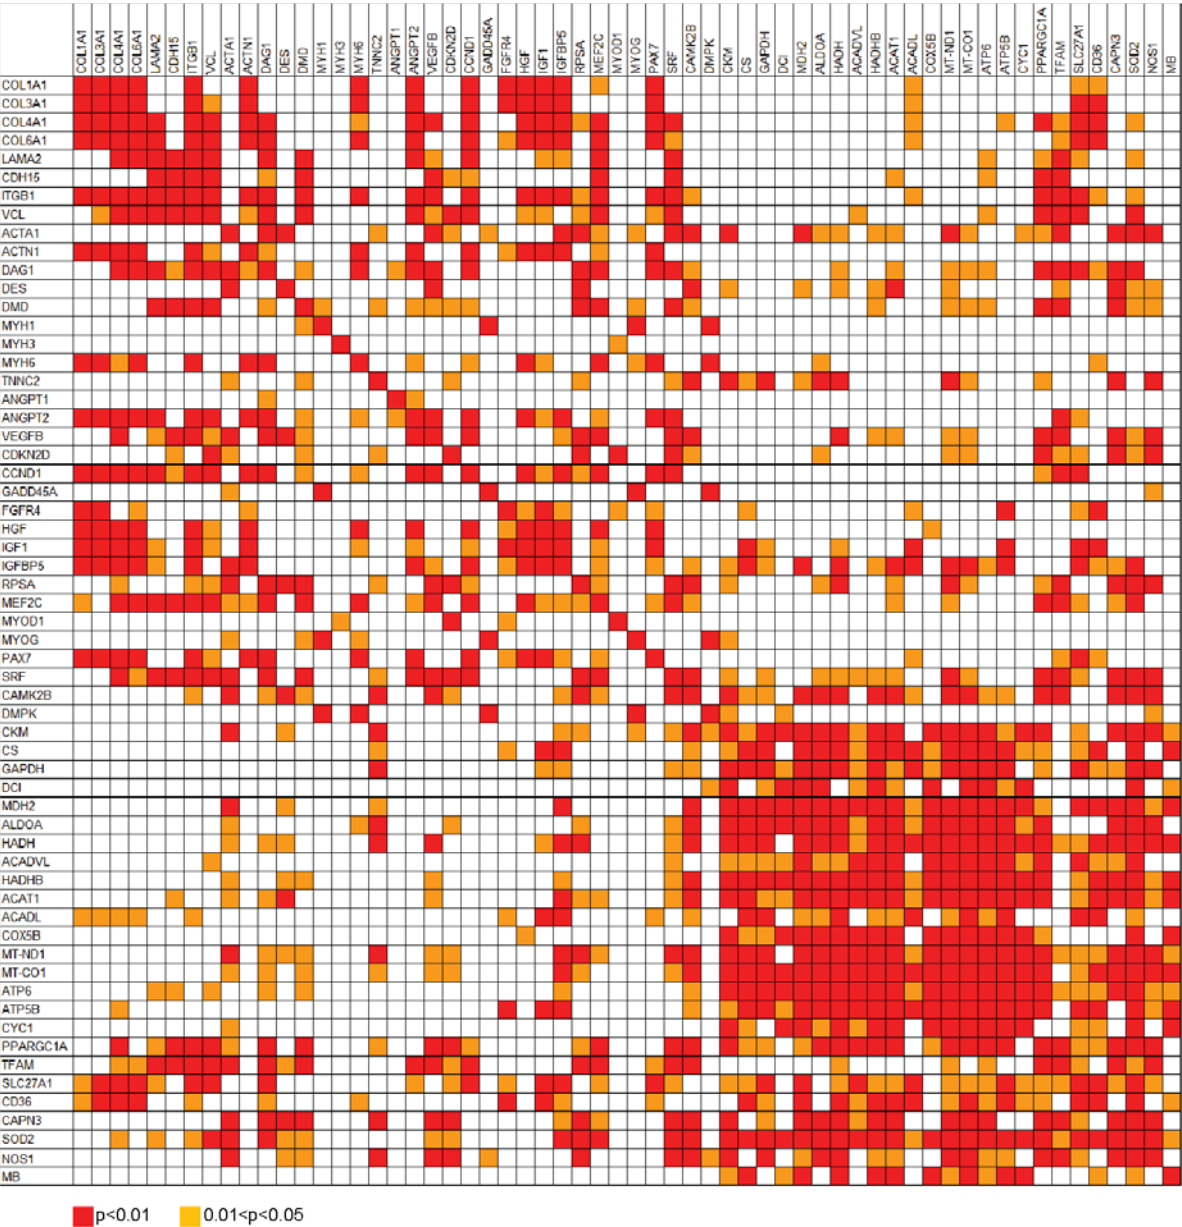

Supplement: Supplementary file 1 [file 1]
