# Supplementary material
Source: publisher figshare collection journal article supplement (https://karger.figshare.com/articles/dataset/_/5121613)
Supplement: Supplementary file 2 [file 1]

| Gene   | Gene Name                                                 | Gene     | Gene Name                                           |
|--------|-----------------------------------------------------------|----------|-----------------------------------------------------|
| 18S    | ribosomal RNA                                             | IL6      | interleukin 6                                       |
| ACADL  | acyl-Coenzyme A dehydrogenase                             | IL6R     | interleukin 6 receptor                              |
| ACADM  | acyl-Coenzyme A dehydrogenase                             | IL8      | interleukin 8                                       |
| ACADVL | acyl-Coenzyme A dehydrogenase                             | IL8RA    | interleukin 8 receptor                              |
| ACAT1  | acetyl-Coenzyme A acetyltransferase 1                     | INSR     | insulin receptor                                    |
| ACE    | angiotensin I converting enzyme                           | ITGA2    | integrin, alpha 2                                   |
| ACTA1  | alpha sarcomeric actin                                    | ITGA7    | integrin, alpha 7                                   |
| ACTB   | beta-actin                                                | ITGB1    | integrin, beta 8                                    |
| ACTN1  | actinin, alpha 1                                          | JUN      | jun oncogene                                        |
| ACTN2  | actinin, alpha 2                                          | KDR      | VEGF-Receptor 2                                     |
| ADMR   | adrenomedullin receptor                                   | LAMA2    | laminin alpha 2                                     |
| ADORA1 | adenosine A1 receptor                                     | LAMA4    | laminin alpha 4                                     |
| AGRN   | agrin                                                     | LDHA     | lactate dehydrogenase A                             |
| AKT1   | protein Kinase B, PKB                                     | LDHB     | lactate dehydrogenase B                             |
| ALDOA  | aldolase A                                                | LGALS1   | lectin, galactose binding, soluble 1                |
| ALDOC  | aldolase C                                                | LIPE     | lipase, hormone sensitive                           |
| ANGPT1 | angiotensin 1                                             | LPL      | lipoprotein lipase                                  |
| ANGPT2 | angiotensin 2                                             | MAPK8    | mitogen-activated protein kinase 8                  |
| ANKRD2 | ankyrin repeat domain 2 (stretch responsive muscle)       | MB       | myoglobin                                           |
| AR     | androgen receptor (dihydrotestosterone receptor)          | MDH2     | malate dehydrogenase 2                              |
| ATP2A1 | ATPase, Ca++ transporting, fast twitch 1                  | MEF2B    | myocyte enhancer factor 2B                          |
| ATP2A2 | ATPase, Ca++ transporting, slow twitch 2                  | MEF2C    | myocyte enhancer factor 2C                          |
| ATP5B  | F1FO ATPase, beta subunit                                 | MET      | hepatocyte growth factor receptor                   |
| ATP6   | ATP synthase 6, mt encoded                                | MMP11    | matrix metalloproteinase 11 (stromelysin 3)         |
| BCKDHA | branched chain keto acid dehydrogenase E1                 | MMP2     | matrix metalloproteinase 2 (gelatinase A)           |
| BDNF   | brain-derived neurotrophic factor                         | MMP8     | matrix metalloproteinase 8 (neutrophil collagenase) |
| CA3    | carbonic anhydrase III                                    | MMP9     | matrix metalloproteinase 9 (gelatinase B)           |
| CAMK2B | CaM kinase II beta                                        | MT-CO1   | mitochondrially encoded cytochrome c oxidase I      |
| CAPN1  | calpain 1                                                 | MT-ND1   | NADH gene 1, mt encoded                             |
| CAPN2  | calpain 2                                                 | MUSK     | muscle, skeletal, receptor tyrosine kinase          |
| CAPN3  | calpain 3, p94                                            | MYF6     | myogenic factor 6 (herculin)                        |
| CAST   | calpastatin (calpain inhibitor)                           | MYH1     | myosin heavy chain, 2X                              |
| CCL2   | chemokine (C-C motif) ligand 2                            | MYH2     | myosin heavy chain 2A                               |
| CCNA1  | cyclin A1                                                 | MYH3     | myosin heavy chain, embryonic                       |
| CCND1  | cyclin D1                                                 | MYH4     | myosin heavy chain, 2B                              |
| CD163  | CD163 molecule, macrophage marker                         | MYH6     | myosin heavy chain 6, cardiac muscle, alpha         |
| CD34   | CD34 molecule, satellite cell marker                      | MYH7     | myosin heavy chain 6, cardiac muscle, beta          |
| CD36   | muscular fatty acid transporter, FAT                      | MYH8     | myosin heavy chain 8, perinatal                     |
| CD68   | CD68 molecule, macrophage marker                          | MYOD1    | myogenic differentiation 1                          |
| CDH15  | cadherin 15                                               | MYOG     | myogenin (myogenic factor 4)                        |
| CDKN1A | cyclin-dependent kinase inhibitor 1A, p21                 | MYOT     | myotilin                                            |
| CDKN2D | cyclin-dependent kinase inhibitor 2D (p19, inhibits CDK4) | NCAM1    | neural cell adhesion molecule 1                     |
| CKM    | creatine kinase                                           | NEB      | nebulin                                             |
| CNTF   | ciliary neurotrophic factor                               | NGFB     | nerve growth factor, beta polypeptide               |
| COL1A1 | collagen, type I, alpha 1                                 | NID1     | nidogen 1                                           |
| COL3A1 | collagen, type III, alpha 1                               | NOS1     | nitric oxide synthase 1 (neuronal)                  |
| COL4A1 | collagen, type IV, alpha 1                                | NR4A3    | Nor1, Transcription factor                          |
| COL6A1 | collagen, type VI, alpha 1                                | NRG1     | neuregulin 1                                        |
| COX4I1 | cytochrome c oxidase subunit IV isoform 1                 | NTE3     | neurotrophin 3                                      |
| COX5B  | cytochrome c oxidase subunit Vb                           | NTF5     | neurotrophin 5 (neurotrophin 4/5)                   |
| CPT1B  | carnitine palmitoyltransferase I                          | Pax7     | paired box 7, satellite cell marker                 |
| CPT2   | carnitine palmitoyltransferase II                         | PDGFA    | platelet-derived growth factor alpha polypeptide    |
| CS     | citrate synthase                                          | PDHA2    | pyruvate dehydrogenase (lipoamide) alpha 2          |
| CYC1   | cytochrome c-1                                            | PDHB     | pyruvate dehydrogenase (lipoamide) beta             |
| DAG1   | dystroglycan                                              | PECAM1   | platelet/endothelial cell adhesion molecule (CD31)  |
| DCI    | dodecenoyl-Coenzyme A delta isomerase                     | PFKM     | phosphofructokinase                                 |
| DES    | desmin                                                    | PGK1     | phosphoglycerate kinase 1                           |
| DMD    | dystrophin (muscular dystrophy)                           | PMP22    | peripheral myelin protein 22                        |
| DMPK   | dystrophin myotonic-protein kinase                        | PPARA    | peroxisome proliferator-activated receptor alpha    |
| ECH1   | enoyl Coenzyme A hydratase 1                              | PPARG    | peroxisome proliferator-activated receptor gamma    |
| ECHS1  | enoyl Coenzyme A hydratase                                | PPARGC1A | peroxisome proliferator-activated receptor gamma    |
| EEF2   | eukaryotic translation elongation factor 2                | PTK2     | PTK2 protein tyrosine kinase 2                      |
| EIF4E  | eukaryotic translation initiation factor 4E               | RELN     | reelin                                              |
| EPAS1  | endothelial PAS domain protein 1                          | RPL11    | ribosomal protein L11                               |
| ESR1   | estrogen receptor 1                                       | RPS9     | ribosomal protein S9                                |
| FABP3  | fatty acid binding protein 3                              | RPSA     | ribosomal protein SA                                |
| FASN   | fatty acid synthase                                       | SCP2     | sterol carrier protein 2                            |
| FBXO32 | F-box protein 32, Atrogin-1                               | SIRT1    | sirtuin                                             |
| FGF2   | basic fibroblast growth factor                            | SLC16A1  | monocarboxylic acid transporter 1, MCT-1            |
| FGFR1  | fibroblast growth factor receptor 1                       | SLC16A4  | monocarboxylic acid transporter 4, MCT-4            |
| FGFR4  | fibroblast growth factor receptor 4                       | SLC27A1  | solute carrier family 27 (fatty acid transporter)   |
| FN1    | fibronectin 1                                             | SLC2A1   | Glucose transporter 1, GLUT1                        |
| FST    | folliculin                                                | SLC2A4   | Glucose transporter 4, GLUT4                        |
| GADD45 | growth arrest and DNA-damage-inducible 45                 | SOD1     | superoxide dismutase 1                              |
| GAPDH  | glyceraldehyde-3-phosphate dehydrogenase                  | SOD2     | superoxide dismutase 2                              |
| GDF8   | growth differentiation factor 8, myostatin                | SOD3     | superoxide dismutase 3                              |
| GHRL   | ghrelin/obestatin preprohormone                           | SRF      | serum response factor                               |
| GSP2   | G1 to S phase transition 2                                | TCP1     | t-complex 1, molecular chaperone                    |
| GYS1   | glycogen synthase 1 (muscle)                              | TFAM     | transcription factor A, mitochondrial               |
| HADH   | hydroxyacyl-Coenzyme A dehydrogenase                      | TGFB1    | transforming growth factor beta 1                   |
| HADHB  | dehydrogenase/thiolase/hydratase (trifunctional)          | TNC      | tenascin C                                          |
| HGF    | hepatocyte growth factor                                  | TNF      | tumor necrosis factor                               |
| HIF1A  | hypoxia-inducible factor 1                                | TNFRSF1A | tumor necrosis factor receptor superfamily          |
| HK2    | hexokinase 2                                              | TNNC1    | troponin C type 1 (slow)                            |
| HNF4A  | hepatic nuclear factor 4, alpha                           | TNNC2    | troponin C type 2 (fast)                            |
| HSPA4  | heat shock 70kDa protein 4                                | TTN      | titin                                               |
| IGF1   | insulin-like growth factor 1 (somatomedin C)              | TUBA1    | tubulin                                             |
| IGF1R  | insulin-like growth factor 1 receptor                     | UBC      | ubiquitin c                                         |
| IGF2   | insulin-like growth factor 2 (somatomedin A)              | UBTF     | upstream binding transcription factor               |
| IGF2R  | insulin-like growth factor 2 receptor                     | UCP3     | uncoupling protein 3, mitochondrial                 |
| IGFBP4 | insulin-like growth factor binding protein 4              | VCL      | vinculin                                            |
| IGFBP5 | insulin-like growth factor binding protein 5              | VEGF     | vascular endothelial growth factor                  |
| IL1B   | interleukin 1 beta                                        | VEGFB    | vascular endothelial growth factor beta             |
| IL1R1  | interleukin 1 receptor                                    |          |                                                     |

## Supplementary table 4

Lists all 187 gene transcripts which were analyzed with the microfluidic cards.
